# Supplementary material
Source: PubMed Central journal article supplement (PMC7673640)
Supplement: hcq-13-e007303-s001.pdf [file hcq-13-e007303-s001.pdf]

## SUPPLEMENTAL MATERIAL

Supplementary Table I. Sensitivity Analysis of patients with an in-hospital cardiac arrest during COVID-19 pandemic compared to same period in 2019 ( March 1<sup>st</sup>-May 15<sup>th</sup> 2020 vs March 1<sup>st</sup>-May 15<sup>th</sup> 2019)

| Variable                            | Pre-COVID-19<br>Pandemic (March<br>1 <sup>st</sup> -May 15 <sup>th</sup> 2019)<br>N=23 | During COVID-19<br>Pandemic (March 1 <sup>st</sup> -<br>May 15 <sup>th</sup> 2020)<br>N=125 | p-value          |
|-------------------------------------|----------------------------------------------------------------------------------------|---------------------------------------------------------------------------------------------|------------------|
| Age * (interquartile range)         | 74(21)                                                                                 | 67(19)                                                                                      | 0.05             |
| Female, n (%)                       | 10 (43)                                                                                | 43 (34)                                                                                     | 0.41             |
| Acute Stroke, n (%)                 | 0 (0)                                                                                  | 1 (.8)                                                                                      | 0.67             |
| Acute Heart Failure, n (%)          | 0 (0)                                                                                  | 3 (2)                                                                                       | 0.45             |
| Prior Heart Failure, n (%)          | 7 (30)                                                                                 | 16 (13)                                                                                     | <b>0.03</b>      |
| Diabetes, n (%)                     | 9 (39)                                                                                 | 48 (38)                                                                                     | 0.95             |
| Hepatic insufficiency, n (%)        | 1 (4)                                                                                  | 4 (3)                                                                                       | 0.78             |
| Trauma, n (%)                       | 7 (30)                                                                                 | 3 (2)                                                                                       | <b>&lt;0.001</b> |
| Malignancy, n (%)                   | 3 (13)                                                                                 | 12 (10)                                                                                     | 0.61             |
| Electrolyte Abnormality, n (%)      | 7 (30)                                                                                 | 28 (22)                                                                                     | 0.41             |
| Active Myocardial Infarction, n (%) | 2 (9)                                                                                  | 0 (0)                                                                                       | <b>0.001</b>     |
| Prior Myocardial Infarction, n (%)  | 2 (9)                                                                                  | 0 (0)                                                                                       | <b>0.001</b>     |
| Renal Insufficiency, n (%)          | 8 (35)                                                                                 | 41 (33)                                                                                     | 0.85             |
| Pneumonia, n (%)                    | 6 (26)                                                                                 | 94 (75)                                                                                     | <b>&lt;0.001</b> |
| Sepsis, n (%)                       | 9 (39)                                                                                 | 25 (20)                                                                                     | 0.05             |

|                                                |         |          |              |
|------------------------------------------------|---------|----------|--------------|
| Mechanical Ventilation, n (%)                  | 63 (54) | 60 (48)  | 0.36         |
| Hypotension/Hypoperfusion, n (%)               | 14 (61) | 57 (46)  | 0.18         |
| <b>In-Hospital Cardiac Arrest Location</b>     |         |          | <b>0.002</b> |
| Emergency Department, n (%)                    | 6 (26)  | 26 (21)  |              |
| General ward, n (%)                            | 2 (9)   | 58 (46)  |              |
| Intensive Care Unit, n (%)                     | 15 (65) | 41 (33)  |              |
| <b>Initial Pulseless Rhythm</b>                |         |          | <b>0.81</b>  |
| Asystole, n (%)                                | 9 (39)  | 46 (37)  |              |
| Pulseless Electrical Activity, n (%)           | 13 (57) | 67 (54)  |              |
| VF/VT, n (%)                                   | 0 (0)   | 4 (3)    |              |
| Unknown, n (%)                                 | 1 (4)   | 8 (6)    |              |
| Endotracheal Tube Insertion, n (%)             | 10 (83) | 38 (52)  | 0.05         |
| Time to Intubation, min (interquartile range)  | 9 (12)  | 5 (10)   | 0.54         |
| Epinephrine Use, n (%)                         | 21 (91) | 121 (97) | 0.22         |
| Number of Epinephrine given, n (%)             | 3 (3)   | 2 (1)    | 0.62         |
| Time to Epinephrine, min (interquartile range) | 1(2)    | 2 (2)    | 0.27         |
| Anti-Arrhythmic Use, n (%)                     | 1 (4)   | 14 (11)  | 0.31         |
| Any Vasopressor Use, n (%)                     | 14 (61) | 59 (47)  | 0.23         |
| Use of Wave-Form Capnography, n (%)            | 12 (52) | 69 (55)  | 0.78         |
| IHCA Duration, min (interquartile range)       | 11 (20) | 11(13)   | 0.94         |

|                                                                      |         |         |              |
|----------------------------------------------------------------------|---------|---------|--------------|
| range)                                                               |         |         |              |
| Return of Spontaneous Circulation achieved, n (%)                    | 16 (70) | 45 (36) | <b>0.003</b> |
| Time to Return of Spontaneous Circulation, min (Interquartile Range) | 5 (11)  | 9 (11)  | 0.24         |
| Recurrent IHCA, n (%)                                                | 11 (47) | 13 (29) | 0.12         |
| Survival at Discharge, n (%)                                         | 3 (13)  | 4 (3)   | <b>0.04</b>  |

\*Median in years
